# Supplementary material
Source: Springer Nature journal article supplement (https://www.springermedizin.de/resource/supplementary/12885_2009_1891_MOESM7_ESM.pdf/9461502)

**A**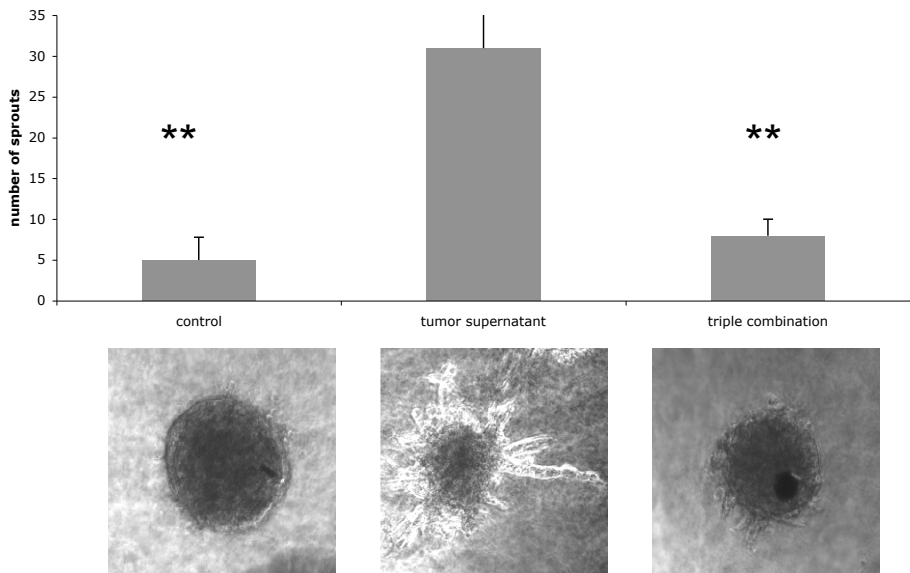**B**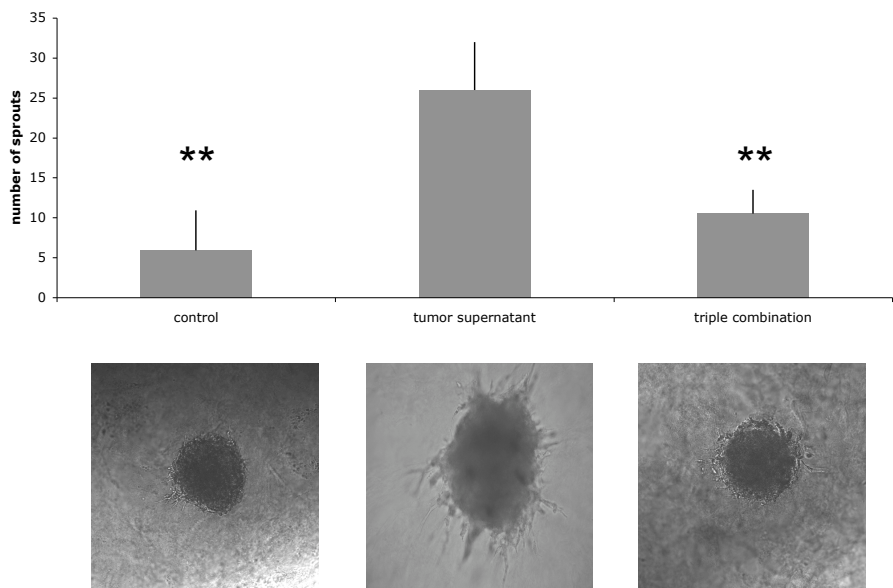**\*\* = p ≤ 0,01**

Supplement: MOESM7 [file 9461502]
